# Supplementary material for: Survival landscape of different tumor regression grades and pathologic complete response in rectal cancer after neoadjuvant therapy based on reconstructed individual patient data
Source: PubMed Central journal article supplement (PMC8590217; doi:10.1186/s12885-021-08922-1), 2021-11-13

| <b>Tumor regression %</b> | 100 | $50 \leq TR < 100$ | <50 |     |
|---------------------------|-----|--------------------|-----|-----|
| <b>Dworak-TRG</b>         | 4   | 3                  | 2   | 1+0 |
| <b>AJCC-TRG</b>           | 0   | 1                  | 2   | 3   |

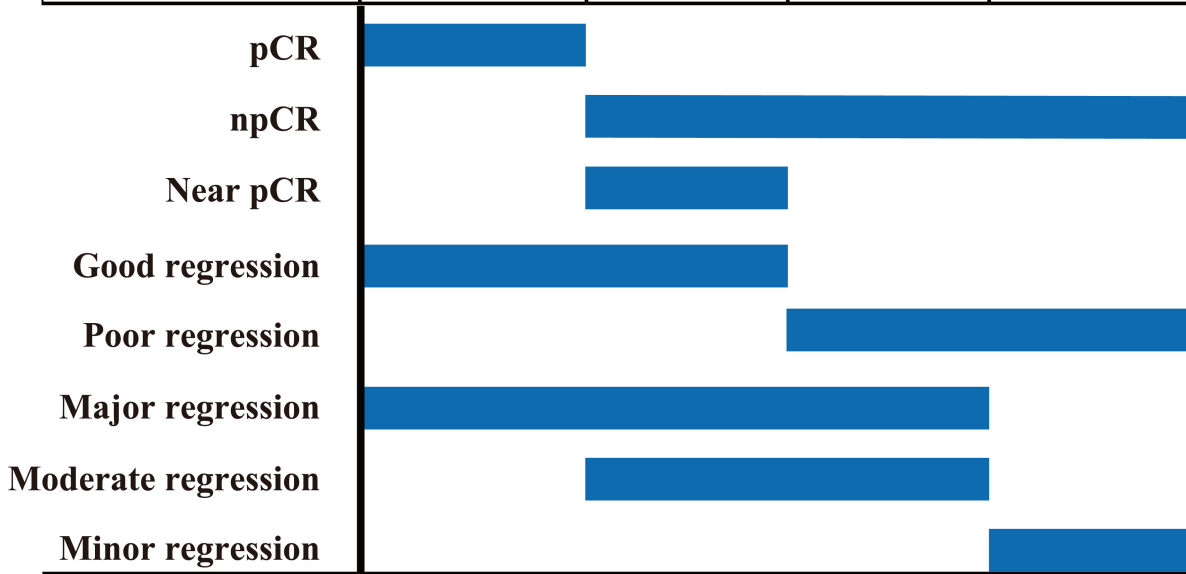

Supplement: 12885_2021_8922_MOESM1_ESM.pdf [file 12885_2021_8922_MOESM1_ESM.pdf]
