# Supplementary material for: Survival landscape of different tumor regression grades and pathologic complete response in rectal cancer after neoadjuvant therapy based on reconstructed individual patient data
Source: PubMed Central journal article supplement (PMC8590217; doi:10.1186/s12885-021-08922-1), 2021-11-13

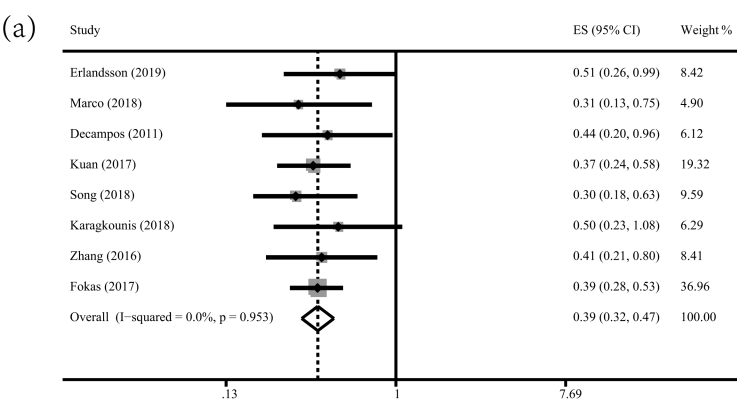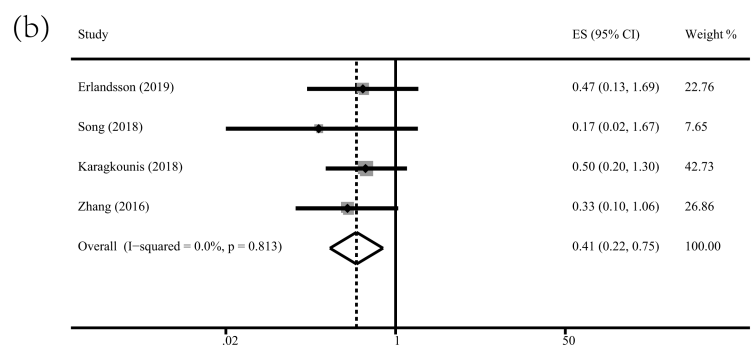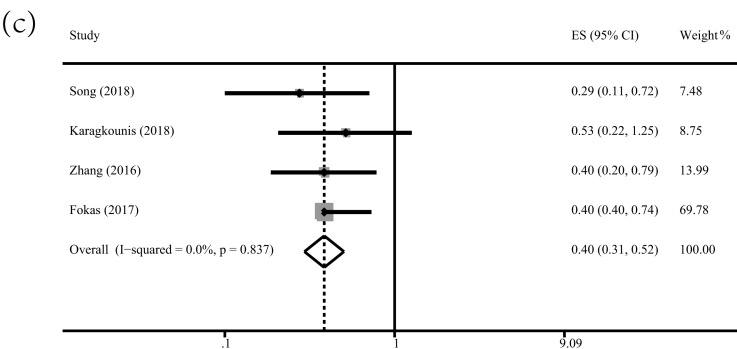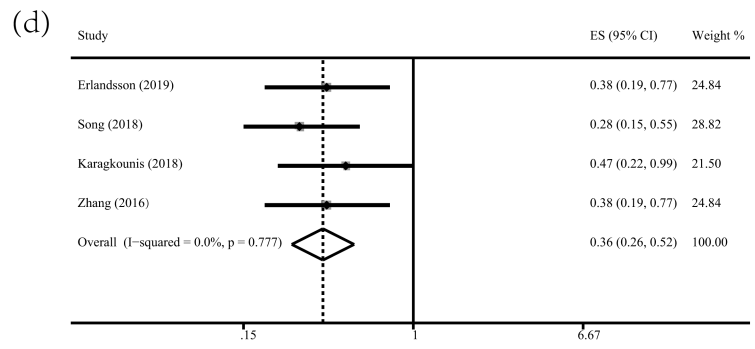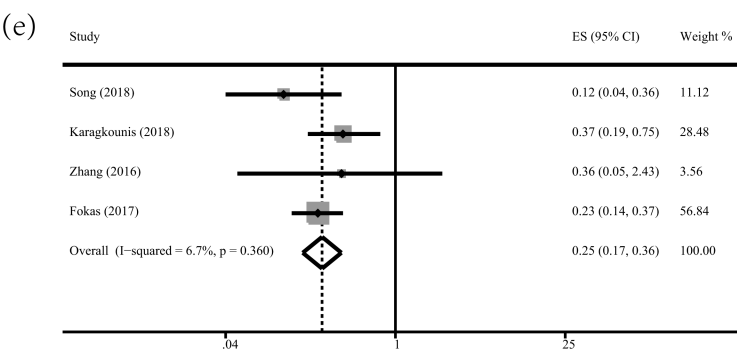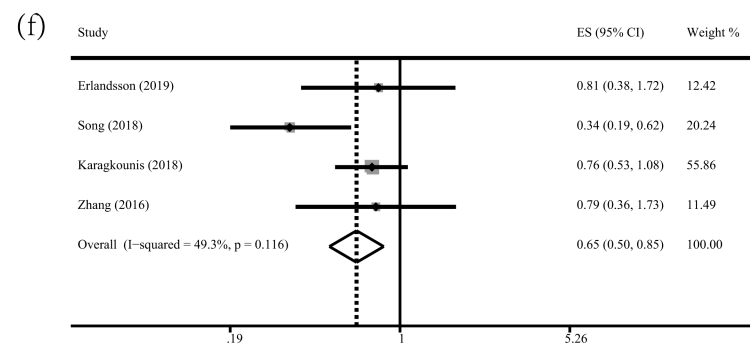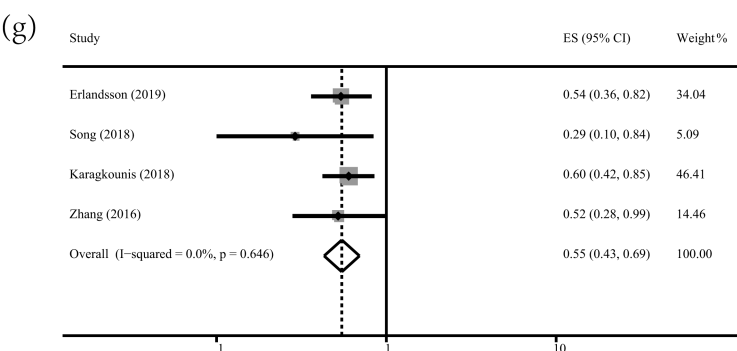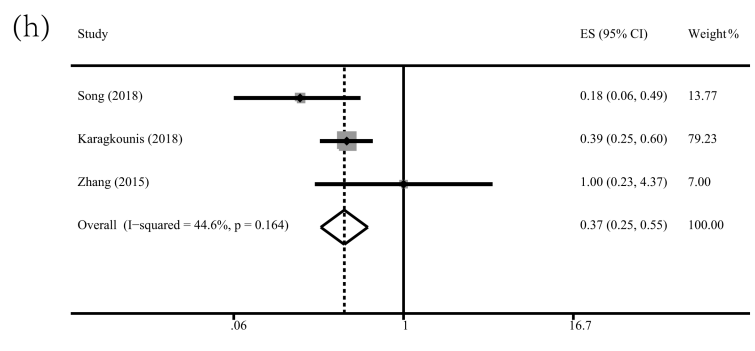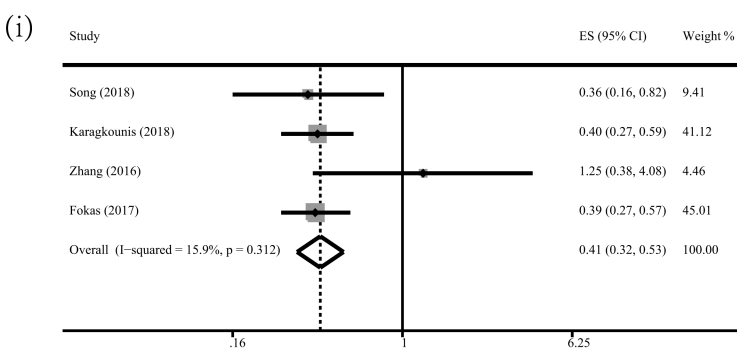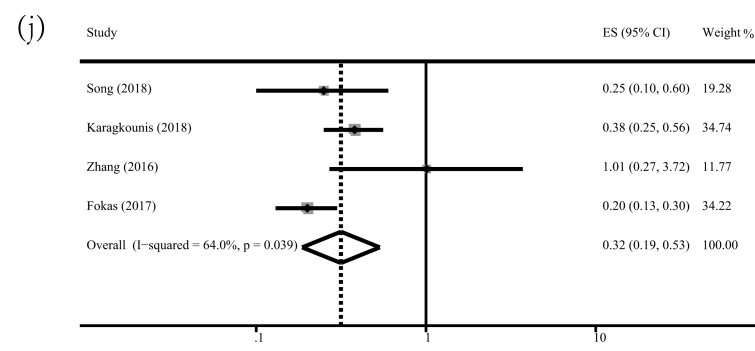

Supplement: 12885_2021_8922_MOESM2_ESM.pdf [file 12885_2021_8922_MOESM2_ESM.pdf]
