# Supplementary material for: Survival landscape of different tumor regression grades and pathologic complete response in rectal cancer after neoadjuvant therapy based on reconstructed individual patient data
Source: PubMed Central journal article supplement (PMC8590217; doi:10.1186/s12885-021-08922-1), 2021-11-13
Supplement: 12885_2021_8922_MOESM4_ESM.pdf [file 12885_2021_8922_MOESM4_ESM.pdf]

**Supplementary Table1.** Annual survival rate of each group

| Group      |                     | Survival rate % |        |        |        |        |        |        |        |        |         | Median survival time |       |        |
|------------|---------------------|-----------------|--------|--------|--------|--------|--------|--------|--------|--------|---------|----------------------|-------|--------|
|            |                     | 1-year          | 2-year | 3-year | 4-year | 5-year | 6-year | 7-year | 8-year | 9-year | 10-year | (range, year)        |       |        |
| <b>OS</b>  | pCR                 | 99.5            | 97.3   | 96.5   | 95.1   | 93.5   | 90.0   | 90.0   | 90.0   | 80.5   | 80.5    | /                    |       |        |
|            | Good regression     | 99.4            | 96.9   | 94.1   | 88.7   | 85.8   | 82.9   | 81.3   | 77.3   | 61.1   | 61.1    | /                    |       |        |
|            | Near pCR            | 99.2            | 96.5   | 93.4   | 86.2   | 83.1   | 80.4   | 79.3   | 71.7   | 53.6   | 53.6    | /                    |       |        |
|            | Major regression    | 98.3            | 95.1   | 91.8   | 87.4   | 83.7   | 79.5   | 76.2   | 71.2   | 60.5   | 55.9    | /                    |       |        |
|            | Moderate regression | 97.9            | 94.2   | 89.0   | 83.1   | 78.9   | 74.0   | 70.7   | 63.0   | 53.0   | 50.9    | 10.244               | 8.679 | 11.808 |
|            | npCR                | 97.6            | 92.0   | 87.3   | 80.3   | 74.4   | 68.3   | 63.6   | 57.9   | 52.3   | 48.3    | 9.458                | 8.843 | 10.074 |
|            | Poor regression     | 97.1            | 90.8   | 85.3   | 80.2   | 74.3   | 68.1   | 61.9   | 54.8   | 50.8   | 46.1    | 9.192                | 8.546 | 9.837  |
|            | Minor regression    | 95.7            | 85.9   | 75.4   | 66.2   | 59.4   | 51.8   | 47.3   | 39.0   | 33.5   | 20.9    | 6.485                | 5.273 | 7.698  |
| <b>DFS</b> | pCR                 | 97.5            | 94.6   | 92.7   | 92.0   | 90.1   | /      | /      | /      | /      | /       | /                    |       |        |
|            | Good regression     | 94.8            | 89.2   | 84.0   | 81.8   | 78.4   | /      | /      | /      | /      | /       | /                    |       |        |
|            | Near pCR            | 92.7            | 83.9   | 78.6   | 74.8   | 71.7   | /      | /      | /      | /      | /       | /                    |       |        |
|            | Major regression    | 93.4            | 85.7   | 81.2   | 77.5   | 75.0   | /      | /      | /      | /      | /       | /                    |       |        |
|            | Moderate regression | 92.3            | 83.7   | 78.1   | 74.1   | 71.6   | /      | /      | /      | /      | /       | /                    |       |        |
|            | npCR                | 92.2            | 82.4   | 76.6   | 72.4   | 69.8   | /      | /      | /      | /      | /       | /                    |       |        |
|            | Poor regression     | 92.0            | 81.9   | 76.4   | 72.3   | 69.5   | /      | /      | /      | /      | /       | /                    |       |        |
|            | Minor regression    | 86.0            | 72.7   | 65.4   | 61.8   | 58.9   | /      | /      | /      | /      | /       | /                    |       |        |

pCR: pathological complete response; npCR: non-pCR; “/”: there is no relevant data
