# Supplementary material for: Survival landscape of different tumor regression grades and pathologic complete response in rectal cancer after neoadjuvant therapy based on reconstructed individual patient data
Source: PubMed Central journal article supplement (PMC8590217; doi:10.1186/s12885-021-08922-1), 2021-11-13
Supplement: 12885_2021_8922_MOESM5_ESM.pdf [file 12885_2021_8922_MOESM5_ESM.pdf]

**Supplementary Table 2.** 5-year survival outcomes of comparison between groups

|            |                    | IPD   |       |       |          |
|------------|--------------------|-------|-------|-------|----------|
|            |                    | HR    | LCI   | UCI   | p for HR |
| <b>OS</b>  | pCR vs. npCR       | 0.233 | 0.166 | 0.327 | <0.001   |
|            | pCR vs. Near       | 0.406 | 0.249 | 0.661 | <0.001   |
|            | pCR vs. Moderate   | 0.294 | 0.206 | 0.419 | <0.001   |
|            | pCR vs. Poor       | 0.235 | 0.165 | 0.333 | <0.001   |
|            | pCR vs. Minor      | 0.124 | 0.085 | 0.182 | <0.001   |
|            | Near vs. Poor      | 0.578 | 0.397 | 0.843 | 0.004    |
|            | Good vs. Poor      | 0.496 | 0.382 | 0.643 | <0.001   |
|            | Near vs. Minor     | 0.308 | 0.206 | 0.460 | <0.001   |
|            | Moderate vs. Minor | 0.424 | 0.339 | 0.530 | <0.001   |
|            | Major vs. Minor    | 0.317 | 0.253 | 0.398 | <0.001   |
| <b>DFS</b> | pCR vs. npCR       | 0.269 | 0.201 | 0.360 | <0.001   |
|            | pCR vs. Near       | 0.276 | 0.189 | 0.404 | <0.001   |
|            | pCR vs. Moderate   | 0.288 | 0.213 | 0.389 | <0.001   |
|            | pCR vs. Poor       | 0.272 | 0.200 | 0.369 | <0.001   |
|            | pCR vs. Minor      | 0.175 | 0.125 | 0.244 | <0.001   |
|            | Near vs. Poor      | 0.978 | 0.742 | 1.289 | 0.874    |
|            | Good vs. Poor      | 0.665 | 0.519 | 0.853 | 0.001    |
|            | Near vs. Minor     | 0.627 | 0.461 | 0.852 | 0.003    |
|            | Moderate vs. Minor | 0.607 | 0.494 | 0.747 | <0.001   |
|            | Major vs. Minor    | 0.523 | 0.427 | 0.641 | <0.001   |

IPD: individual patient data; HR: hazard ratio; LCI: lower 95% confidence interval; UCI: upper 95% confidence interval; I<sup>2</sup>: degree of heterogeneity; OS: overall survival; DFS: disease-free survival; pCR: pathological complete response group; npCR: non-pCR group; Near: near pCR group; Moderate: moderate regression group; Poor: poor regression group; Minor: minor regression group; Good: good regression group; Major: major regression group
