# Supplementary material for: Survival landscape of different tumor regression grades and pathologic complete response in rectal cancer after neoadjuvant therapy based on reconstructed individual patient data
Source: PubMed Central journal article supplement (PMC8590217; doi:10.1186/s12885-021-08922-1), 2021-11-13
Supplement: 12885_2021_8922_MOESM6_ESM.pdf [file 12885_2021_8922_MOESM6_ESM.pdf]

**Supplementary Table 3. Survival outcomes of comparison between groups based on prospective study design**

|            |                    | IPD   |       |       |          | Direct calculation |       |       |          |                                    |
|------------|--------------------|-------|-------|-------|----------|--------------------|-------|-------|----------|------------------------------------|
|            |                    | HR    | LCI   | UCI   | p for HR | HR                 | LCI   | UCI   | p for HR | Heterogeneity (P, I <sup>2</sup> ) |
| <b>OS</b>  | pCR vs. npCR       | 0.200 | 0.130 | 0.309 | <0.001   | 0.412              | 0.322 | 0.526 | <0.001   | 0.882, 0.0%                        |
|            | pCR vs. Near       | 0.273 | 0.155 | 0.482 | <0.001   | 0.489              | 0.230 | 1.042 | 0.064    | 0.939, 0.0%                        |
|            | pCR vs. Moderate   | 0.243 | 0.155 | 0.381 | <0.001   | 0.413              | 0.309 | 0.552 | <0.001   | 0.549, 0.0%                        |
|            | pCR vs. Poor       | 0.202 | 0.130 | 0.315 | <0.001   | 0.419              | 0.251 | 0.700 | 0.001    | 0.685, 0.0%                        |
|            | pCR vs. Minor      | 0.103 | 0.064 | 0.164 | <0.001   | 0.270              | 0.181 | 0.401 | <0.001   | 0.268, 18.5%                       |
|            | Good vs. Poor      | 0.576 | 0.414 | 0.801 | 0.001    | 0.574              | 0.439 | 0.750 | <0.001   | 0.703, 0.0%                        |
|            | Near vs. Minor     | 0.369 | 0.246 | 0.554 | <0.001   | 0.390              | 0.250 | 0.600 | /        | /                                  |
|            | Moderate vs. Minor | 0.423 | 0.336 | 0.533 | <0.001   | 0.395              | 0.301 | 0.517 | <0.001   | 0.927, 0.0%                        |
|            | Major vs. Minor    | 0.322 | 0.255 | 0.407 | <0.001   | 0.276              | 0.147 | 0.518 | <0.001   | 0.030, 78.7%                       |
| <b>DFS</b> | pCR vs. npCR       | 0.270 | 0.193 | 0.377 | <0.001   | 0.419              | 0.338 | 0.519 | <0.001   | 0.892, 0.0%                        |
|            | pCR vs. Near       | 0.205 | 0.130 | 0.324 | <0.001   | 0.426              | 0.214 | 0.845 | 0.015    | 0.861, 0.0%                        |
|            | pCR vs. Moderate   | 0.294 | 0.207 | 0.418 | <0.001   | 0.487              | 0.361 | 0.657 | <0.001   | 0.837, 0.0%                        |
|            | pCR vs. Poor       | 0.303 | 0.212 | 0.434 | <0.001   | 0.251              | 0.122 | 0.518 | <0.001   | 0.915, 0.0%                        |
|            | pCR vs. Minor      | 0.182 | 0.124 | 0.267 | <0.001   | 0.277              | 0.193 | 0.397 | <0.001   | 0.327, 0.0%                        |
|            | Good vs. Poor      | 1.001 | 0.719 | 1.393 | 0.994    | 0.554              | 0.371 | 0.826 | 0.004    | 0.834, 0.0%                        |
|            | Near vs. Minor     | 0.885 | 0.608 | 1.289 | 0.525    | /                  | /     | /     | /        | /                                  |
|            | Moderate vs. Minor | 0.619 | 0.489 | 0.783 | <0.001   | 0.591              | 0.453 | 0.772 | <0.001   | 0.693, 0.0%                        |
|            | Major vs. Minor    | 0.538 | 0.427 | 0.679 | <0.001   | 0.474              | 0.358 | 0.628 | <0.001   | 0.436, 0.0%                        |

IPD: individual patient data; HR: hazard ratio; LCI: lower 95% confidence interval; UCI: upper 95% confidence interval; I<sup>2</sup>: degree of heterogeneity; OS: overall survival; DFS: disease-free survival; pCR: pathological complete response group; npCR: non-pCR group; Near: near

pCR group; Moderate: moderate regression group; Poor: poor regression group; Minor: minor regression group; Good: good regression group; Major: major regression group; “/”: not applicable due to limited data
