# Supplementary material for: Survival landscape of different tumor regression grades and pathologic complete response in rectal cancer after neoadjuvant therapy based on reconstructed individual patient data
Source: PubMed Central journal article supplement (PMC8590217; doi:10.1186/s12885-021-08922-1), 2021-11-13
Supplement: 12885_2021_8922_MOESM7_ESM.pdf [file 12885_2021_8922_MOESM7_ESM.pdf]

**Supplementary Table 4. Survival outcomes of comparison between groups based on RT + 5-FU-based-monotherapy neoadjuvant therapy**

|            |                    | IPD   |       |       |          | Direct calculation |       |       |          |                                    |
|------------|--------------------|-------|-------|-------|----------|--------------------|-------|-------|----------|------------------------------------|
|            |                    | HR    | LCI   | UCI   | p for HR | HR                 | LCI   | UCI   | p for HR | Heterogeneity (P, I <sup>2</sup> ) |
| <b>OS</b>  | pCR vs. npCR       | 0.244 | 0.172 | 0.345 | <0.001   | 0.384              | 0.308 | 0.478 | <0.001   | 0.879, 0.0%                        |
|            | pCR vs. Near       | 0.500 | 0.295 | 0.848 | 0.010    | 0.424              | 0.179 | 1.005 | 0.051    | 0.379, 0.0%                        |
|            | pCR vs. Moderate   | 0.336 | 0.233 | 0.484 | <0.001   | 0.400              | 0.303 | 0.528 | <0.001   | 0.653, 0.0%                        |
|            | pCR vs. Poor       | 0.220 | 0.151 | 0.321 | <0.001   | 0.349              | 0.214 | 0.571 | <0.001   | 0.307, 4.2%                        |
|            | pCR vs. Minor      | 0.141 | 0.096 | 0.206 | <0.001   | 0.246              | 0.169 | 0.357 | <0.001   | 0.215, 34.9%                       |
|            | Near vs. Poor      | 0.469 | 0.311 | 0.705 | 0.004    | 0.527              | 0.240 | 1.156 | 0.110    | 0.022, 80.8%                       |
|            | Good vs. Poor      | 0.444 | 0.334 | 0.589 | <0.001   | 0.558              | 0.400 | 0.780 | 0.001    | 0.204, 38.1%                       |
|            | Near vs. Minor     | 0.291 | 0.192 | 0.442 | <0.001   | 0.348              | 0.232 | 0.521 | <0.001   | 0.183, 43.6%                       |
|            | Moderate vs. Minor | 0.417 | 0.336 | 0.518 | <0.001   | 0.391              | 0.303 | 0.506 | <0.001   | 0.974, 0.0%                        |
|            | Major vs. Minor    | 0.317 | 0.255 | 0.396 | <0.001   | 0.272              | 0.171 | 0.432 | <0.001   | 0.093, 57.8%                       |
| <b>DFS</b> | pCR vs. npCR       | 0.255 | 0.174 | 0.374 | <0.001   | 0.417              | 0.331 | 0.526 | <0.001   | 0.751, 0.0%                        |
|            | pCR vs. Near       | 0.310 | 0.192 | 0.502 | <0.001   | 0.410              | 0.214 | 0.784 | 0.007    | 0.750, 0.0%                        |
|            | pCR vs. Moderate   | 0.575 | 0.451 | 0.733 | <0.001   | 0.448              | 0.334 | 0.600 | <0.001   | 0.380, 0.0%                        |
|            | pCR vs. Poor       | 0.229 | 0.149 | 0.351 | <0.001   | 0.304              | 0.190 | 0.487 | <0.001   | 0.710, 0.0%                        |
|            | pCR vs. Minor      | 0.176 | 0.115 | 0.269 | <0.001   | 0.230              | 0.159 | 0.332 | <0.001   | 0.398, 0.0%                        |
|            | Near vs. Poor      | 0.736 | 0.507 | 1.069 | 0.107    | 0.514              | 0.347 | 0.761 | 0.001    | 0.363, 0.0%                        |
|            | Good vs. Poor      | 0.531 | 0.371 | 0.760 | 0.001    | 0.415              | 0.260 | 0.664 | <0.001   | 0.412, 0.0%                        |
|            | Near vs. Minor     | 0.565 | 0.390 | 0.818 | 0.003    | 0.280              | 0.133 | 0.591 | /        | /                                  |
|            | Moderate vs. Minor | 0.306 | 0.207 | 0.452 | <0.001   | 0.553              | 0.417 | 0.733 | <0.001   | 0.700, 0.0%                        |
|            | Major vs. Minor    | 0.490 | 0.386 | 0.624 | <0.001   | 0.423              | 0.314 | 0.570 | <0.001   | 0.633, 0.0%                        |

RT: radiotherapy; FU: fluorouracil; IPD: individual patient data; HR: hazard ratio; LCI: lower 95% confidence interval; UCI: upper 95% confidence interval;  $I^2$ : degree of heterogeneity; OS: overall survival; DFS: disease-free survival; pCR: pathological complete response group; npCR: non-pCR group; Near: near pCR group; Moderate: moderate regression group; Poor: poor regression group; Minor: minor regression group; Good: good regression group; Major: major regression group; “/”: not applicable due to limited data
